# Supplementary material for: Molecular Biology and Pathological Process of an Infectious Bronchitis Virus With Enteric Tropism in Commercial Broilers
Source: Preprints.org preprint supplement (doi:10.20944/preprints202107.0020.v1), 2021-07-01
Supplement: Supplementary file 1 [file supplementary]

## Sheet: Sheet1
Table S4. Mean viral loads in tears and cloacal swabs from birds challenged with either infectious bronchitis virus CalEnt or M41 strains via crop gavage or oculonasally (ON) at day of infection
at 1, 2, 4, 6, 10 and 14 days post-infection (dpi). Values are represented as 44 (number of cycles in the RT-qPCR) minus the Cq. Different superscripts represent statistical significance (P<0.05)
within a column and within a specimen. SD = standard deviation.
Specimen	Groups*	1 dpi		2 dpi		4 dpi		6 dpi		10 dpi		14 dpi
		Mean	SD	Mean	SD	Mean	SD	Mean	SD	Mean	SD	Mean	SD
Tears	(1) CalEnt crop	11.02ab	5.88	8.94a	8.87	15.11a	3.25	17.62a	1.72	18.18a	1.89	10.74ab	4.24
	(2) CalEnt ON	19.06ab	0.8	17.26ab	1.36	18.63ab	2.95	20.80b	1.53	16.69a	3.07	9.84a	0.65
	(3) M41 crop	4.60a	4.3	8.94a	8.87	22.00b	5.46	27.78c	1.3	24.99b	2.98	13.46b	12.26
	(4) M41 ON	22.46b	12.62	26.85b	1.16	30.16c	0.62	26.12c	1.83	17.55a	1.53	2.08ab	0.39
Cloacal swabs	(1) CalEnt crop	7.84ab	2.68	18.82b	8.03	21.27ns	6.17	21.24ns	5.7	18.72b	1.16	15.46ns	1.03
	(2) CalEnt ON	8.54ab	1.66	16.85b	6.36	18.67ns	6.05	22.88ns	2.3	19.46b	1.72	14.71ns	3.66
	(3) M41 crop	1.95a	2.71	3.39a	3.42	12.42ns	6.71	15.97ns	6.5	12.06a	4.78	8.53ns	4.78
	(4) M41 ON	12.38b	6.39	10.36ab	1.21	15.54ns	4.4	17.25ns	7.8	15.47ab	2.94	9.21ns	6.4
*Group 5 (unchallenged controls) is not listed since no amplification was detected in any specimen at any timepoint.
nsNo statistical differences observed.
