# Supplementary material for: Molecular Biology and Pathological Process of an Infectious Bronchitis Virus With Enteric Tropism in Commercial Broilers
Source: Preprints.org preprint supplement (doi:10.20944/preprints202107.0020.v1), 2021-07-01
Supplement: Supplementary file 2 [file Table S1 FINAL.xlsx]

## Sheet: Sheet1
Table S1. Percent nucleotide identity of infectious bronchitis virus sequences using the complete viral genomes aligned using MAFFT (Katoh et al., 2013)
	Ark DPI GQ504721	Cal 99 AY514485	Cal 557 FJ904715	Cal 56b GU393331	Cal 1995 FJ904714	Conn 46 FJ904716	FL 18288 GU393333	M41 FJ904713	H120 JFJ807652	M41 vaccine GQ504725	CalEnt MW556742	GA 1998 GQ504723	TCoV GQ427176
Ark DPI GQ504721		95.083	94.988	94.458	94.155	94.012	93.925	94.204	94.265	93.288	94.115	93.875	88.476
Cal 99 AY514485	95.083		93.424	94.741	94.563	94.374	94.291	94.197	92.351	92.471	94.321	92.343	88.14
Cal 557 FJ904715	94.988	93.424		94.66	94.524	92.787	92.732	93.155	93.289	92.113	93.127	92.085	87.799
Cal 56b GU393331	94.458	94.741	94.66		96.162	95.017	94.97	94.686	91.919	92.241	94.228	92.713	88.465
Cal 1995 FJ904714	94.155	94.563	94.524	96.162		92.566	92.537	93.085	92.65	92.313	93.181	92.024	87.789
Conn 46 FJ904716	94.012	94.374	92.787	95.017	92.566		99.464	97.025	91.897	92.882	93.667	91.816	88.078
FL 18288 GU393333	93.925	94.291	92.732	94.97	92.537	99.464		96.935	91.832	92.711	93.609	91.761	88.096
M41 FJ904713	94.204	94.197	93.155	94.686	93.085	97.025	96.935		94.326	93.907	94.137	91.929	88.411
H120 JFJ807652	94.265	92.351	93.289	91.919	92.65	91.897	91.832	94.326		96.496	91.55	91.075	86.486
M41 vaccine GQ504725	93.288	92.471	92.113	92.241	92.313	92.882	92.711	93.907	96.496		91.346	90.889	86.593
CalEnt MW556742	94.115	94.321	93.127	94.228	93.181	93.667	93.609	94.137	91.55	91.346		92.257	88.486
GA 1998 GQ504723	93.875	92.343	92.085	92.713	92.024	91.816	91.761	91.929	91.075	90.889	92.257		88.085
TCoV GQ427176	88.476	88.14	87.799	88.465	87.789	88.078	88.096	88.411	86.486	86.593	88.486	88.085
