# Supplementary material for: Molecular Biology and Pathological Process of an Infectious Bronchitis Virus With Enteric Tropism in Commercial Broilers
Source: Preprints.org preprint supplement (doi:10.20944/preprints202107.0020.v1), 2021-07-01
Supplement: Supplementary file 3 [file Table S2 FINAL.xlsx]

## Sheet: Sheet1
Table S2. Percent nucleotide identity of infectious bronchitis virus sequences using full spike gene sequences aligned using MAFFT (Katoh et al., 2013)
	Ark DPI GQ504721	Cal 99 AY514485	Cal 557 FJ904715	Cal 56b GU393331	Cal 1995 FJ904914	Conn 46 FJ904716	FL 18288 GU393333	M41 FJ904713	H120 JFJ807652	M41 vaccine GQ504725	CalEnt MW556742	GA 1998 GQ504723	TCoV GQ427176
Ark DPI GQ504721		90.84	84.739	84.984	85.952	87.934	87.621	88.02	87.849	88.006	84.587	67.359	47.449
Cal 99 AY514485	90.84		84.81	85.539	86.422	86.695	86.467	87.009	86.154	86.268	88.362	66.893	47.565
Cal 557 FJ904715	84.739	84.81		89.135	88.936	84.214	83.93	84.526	84.242	84.426	82.624	67.458	47.532
Cal 56b GU393331	84.984	85.539	89.135		97.631	83.961	83.761	83.547	83.575	83.846	83.163	67.053	47.165
Cal 1995 FJ904714	85.952	86.422	88.936	97.631		84.789	84.646	84.344	84.315	84.586	83.362	66.855	47.45
Conn 46 FJ904716	87.934	86.695	84.214	83.961	84.789		98.993	97.392	94.497	94.683	80.47	68.19	46.851
FL 18288 GU393333	87.621	86.467	83.93	83.761	84.646	98.993		96.933	93.952	94.139	80.242	68.257	46.922
M41 FJ904713	88.02	87.009	84.526	83.547	84.344	97.392	96.933		96.704	96.331	80.84	68.396	47.151
H120 JFJ807652	87.849	86.154	84.242	83.575	84.315	94.497	93.952	96.704		99.026	80.755	67.857	47.85
M41 vaccine GQ504725	88.006	86.268	84.426	83.846	84.586	94.683	94.139	96.331	99.026		80.798	67.843	47.656
CalEnt MW556742	84.587	88.362	82.624	83.163	83.362	80.47	80.242	80.84	80.755	80.798		67.19	47.915
GA 1998 GQ504723	67.359	66.893	67.458	67.053	66.855	68.19	68.257	68.396	67.857	67.843	67.19		44.191
TCoV GQ427176	47.449	47.565	47.532	47.165	47.45	46.851	46.922	47.151	47.85	47.656	47.915	44.191
