# Supplementary material for: Molecular Biology and Pathological Process of an Infectious Bronchitis Virus With Enteric Tropism in Commercial Broilers
Source: Preprints.org preprint supplement (doi:10.20944/preprints202107.0020.v1), 2021-07-01
Supplement: Supplementary file 4 [file Table S3 FINAL.xlsx]

## Sheet: Sheet1
Table S3. Percent nucleotide identity of infectious bronchitis virus sequences using a 751-bp fragment of spike gene bearing the S1 hypervariable region; sequences aligned using MAFFT (Katoh et al., 2013)
	Ark DPI GQ504721	Cal 99 AY514485	Cal 557 FJ904715	Cal 56b GU393331	Cal 1995 FJ904714	Conn 46 FJ904716	FL 18288 GU393333	M41 FJ904713	H120 JFJ807652	M41 vaccine GQ504725	CalEnt MW556742	GA 1998 GQ504723	TCoV GQ427176
Ark DPI GQ504721		85.505	81.782	78.856	79.521	72.473	71.676	74.069	74.069	74.136	84.176	58.411	38.247
Cal 99 AY514485	85.505		79.787	77.926	78.059	73.138	71.809	74.867	74.734	75.066	95.479	56.821	37.738
Cal 557 FJ904715	81.782	79.787		84.441	84.574	76.197	74.867	78.191	77.926	78.457	79.987	56.556	39.898
Cal 56b GU393331	78.856	77.926	84.441		98.25	73.62	72.948	73.537	73.005	73.67	77.926	56.631	37.992
Cal 1995 FJ904714	79.521	78.059	84.574	98.25		74.293	73.62	73.67	73.138	73.803	77.926	56.631	38.119
Conn 46 FJ904716	72.473	73.138	76.197	73.62	74.293		97.497	92.202	91.518	92.066	73.005	58.895	36.862
FL 18288 GU393333	71.676	71.809	74.867	72.948	73.62	97.497		90.971	90.287	90.834	71.676	58.378	37.113
M41 FJ904713	74.069	74.867	78.191	73.537	73.67	92.202	90.971		98.906	98.837	75	59.786	37.738
H120 JFJ807652	74.069	74.734	77.926	73.005	73.138	91.518	90.287	98.906		98.7	74.601	59.786	37.611
M41 vaccine GQ504725	74.136	75.066	78.457	73.67	73.803	92.066	90.834	98.837	98.7		75.066	59.182	37.421
CalEnt MW556742	84.176	95.479	79.987	77.926	77.926	73.005	71.676	75	74.601	75.066		57.748	37.103
GA 1998 GQ504723	58.411	56.821	56.556	56.631	56.631	58.895	58.378	59.786	59.786	59.182	57.748		35.422
TCoV GQ427176	38.247	37.738	39.898	37.992	38.119	36.862	37.113	37.738	37.611	37.421	37.103	35.422
